# Supplementary material for: Global vs local glacier modelling: a comparison in the Tien Shan
Source: Copernicus journal article supplement (doi:10.5194/tc-2023-87), 2023-07-27
Supplement: Supplementary file [file tc-2023-87-RC1-supplement.pdf]

## General comments

The study presents an intercomparison of volume projections for the 21<sup>st</sup> century for six glaciers in Tien Shan using multiple different modelling approaches, namely: two approaches in simulating surface mass balance, two approaches in simulating ice flow, and the use of different initial ice thickness estimates as input to the models.

I don't want to sound overly critical, but the impression I am getting (having some experience in supervising grad students over many years) is that the study was undertaken as a necessity to produce one more (often final) chapter for the doctoral thesis, and this project seemed like a relatively straightforward way to achieve this. Regardless if this is the case or not, this study needs to be a stand-alone contribution to scientific knowledge in order to be publishable. The current study fails to do so.

Firstly, the Introduction section is relatively short and poorly addresses some key elements expected to be part of this section, including: setting the context for the study, identifying knowledge gaps, and outlining the relevance and motivation for the objectives of the study. The lack of these elements does not only undermine the quality of presentation (which is relatively poor), but more importantly misses to highlight a novel research objective(s) or question(s) that authors aim to address. It took me a full read of the manuscript to realize that there is no novelty after all, and thus the omission of those elements from the Introduction section may be done on purpose.

All the models used in the study have been previously published and in most cases applied in many other studies. In fact, the leading author has published the results from the 3-D ice flow model applied on the same glaciers as in this study. This for itself does not mean that a novel analysis of previously published models cannot be done, as there are many publications that focused on model intercomparison such as in Farinotti et al., 2019, Hock et al., 2019, Marzeion et al., 2020, Edwards et al., 2021, to name just a few. However, all of these studies had that needed element of novelty that this paper fails to present. Let me elaborate on this a bit more by looking into different aspects of the study:

- a) From the aspect of 'sensitivity analysis': Based on the conclusions that the projections are more sensitive to the choice of initial ice thickness than to choice of mass balance and ice flow models, I can view this study in the light of sensitivity analysis. As such one would expect to see a carefully designed set of experiments that would assure robustness of the analysis and results. After reading the paper, however, I realized that this is not the case. While claiming that the models of different complexities were compared, the authors failed to demonstrate how different these models truly are. In fact, scratching a bit more under the surface and going back to the original references behind these models, it became clear that the two mass balance models, as well as the two ice flow models, are very similar in their setup and application. The two mass balance models are both empirical, both forced by temperature and precipitation (as the only climatic drivers from ERA5 and GCMs), both calibrated to mass balance observations available for these glaciers (though using different mass balance datasets), and both applied locally (per glacier) – the latter makes me also wonder why call only one of these models 'local'. It is highly likely that the two models would produce very similar reconstructions of past mass balance for each of these six glaciers, although the authors do not show this. Similarly goes with the two ice flow models (I give more details on this in the specific comments). The only modelling component that indeed shows large differences among the dataset is the initial ice thickness data, the differences which in some cases exceed 50% in the initial volume. Thus it is

not in any way surprising nor unexpected that the volume projections are most sensitive to the choice of this thickness data, much more so than to the choice of the two mass balance and two ice flow models. For a robust sensitivity analysis (sensitivity of regional glacier volume projections to different modeling components, such as ice thickness, ice flow, and mass balance) I refer the authors to Clarke et al. 2015.

- b) From the aspect of ‘model intercomparison’. The study fails to motivate or provide any relevance to their choice of the models of mass balance and ice flow. Considering that the study uses published models, some of which have been published by the same lead author for the same set of glaciers (Van Tricht and Huybrechts, 2023) I got an impression that the selection of model is based on convenience. GloGEMflow, or its predecessor GloGEM, has been extensively used in model intercomparison studies (e.g. Hock et al. 2019, Marzeion et al., 2020) . Furthermore, a similar version of the ‘simple SEB’ model applied here has also been used as part of sensitivity tests in GloGEM model on global scale (comparing the volume projections; Huss and Hock, 2015). So it is not really clear what knowledge gaps (if any) the authors are trying to address with this intercomparison. More to the point, if this study is publishable, so would be any study that takes a set of published models and intercompares their projections on a selected set of glaciers. Considering the availability of glacier models, but even so the number of studied glaciers worldwide, this could easily yield hundreds of publications. I hope you get my point.
- c) From the aspect of ‘model evaluation’: since the study is not performing any model evaluation as this would require a reference dataset (preferably observations) to which the model simulations are compared to, some of the conclusions (such as ‘a global-scale flowline model is capable of accurately simulating glacier dynamics and evolution’) are inappropriate and unjustified. There is a potential to perform the model evaluation (I give some specific comments on that), but this would require a different model setup and calibration, as well as an independent validation dataset. However, even if this model evaluation is done correctly for the selected six glaciers, the question remains on how representative is the model performance for a large suite of glaciers over the region. And this would be one of the potential knowledge gaps to address.

The specific comments below have been initially written with the idea that the novelty of the study will somehow rise to surface if substantial revisions are made, especially in the Introduction section. However, considering the ‘ill-posed’ nature of the analysis, outlined with my points above, I doubt the revisions to the text can do the job. I hope the authors are able to find a research question or questions that can truly address at least some aspects of the knowledge gaps in the field. The current study fails to identify those gaps and subsequently to address any. Some potential avenues to consider, in my opinion, would be: (1) model evaluation targeted for the entire region (e.g. using the geodetic mass balance observations from Hugonnet et al. 2021 as validation dataset, while calibrating the models with in-situ mass balance observations and data used originally in GloGEM model), (2) coupling the model with hydrology, to derive projections of glacier contribution to streamflow – these may be more relevant for the region than just the glacier volume projections, (3) application of a robust sensitivity analysis, such as the one based on Bayesian inference (see for example Rounce et al, 2020).

## Specific comments

Line 20: Not clear what mass balance models were considered.

Line 49-50: Please expand a bit on this as the Intro is relatively short and leaves an impression that authors are not familiar with many inter-comparison modeling studies that have been done to date. Please mention studies that inter-compared the models of surface mass balance (e.g. temperature-index versus surface energy balance), as well as intercomparison studies of ice flow models of different complexities. While there may be not many of these performed for global scale, there are numerous inter-comparison studies done for individual glaciers, as well as a suite of glaciers, worldwide. I could be listing the references here but I do believe the adequate literature search should be done by authors not by the referees.

Line 58-59: There are a few logical discrepancies here that would be good to fix:

- 'to expand the sample' -> to expand the sample from what reference sample? It would be necessary to provide some information on roughly how many glaciers have been studied in this or similar way (i.e. intercomparison of models). See my comment from above: more references are needed on this topic.

- six well-studied glaciers located in the Tien Shan -> motivation (ideally a short paragraph) is missing on why this particular region and why these six glaciers

Line 60-61: The motivation is also missing on why these two models. Please include a few sentences on both models and state their relevance.

Consider that stating the motivation is necessary to communicate the relevance of your study to a more general glaciological audience than those who are in one way or another already involved in global glacier evolution modelling.

Figure 1: The workflow as displayed in the figure is useful, as an overview of the methods and analysis, but should go to the Methods section, not to the Intro section. Please expand and revise the Intro section to better explain: background knowledge (and knowledge gaps in the field), context, motivation and relevance of your study. Currently, all these key elements of Introduction in a research paper are poorly addressed. Addressing them adequately would help highlighting the novelty of this study. Currently it's not clear to me what the novelty (as advancement of the knowledge in the field) actually is or will be with this paper. To state it more philosophically: not every new analysis is novel, and not every novel result needs to come from a new analysis.

Figure 2: Rather than showing this large map of the region, it would be much more informative to show the topographic maps of the six glaciers.

Line 100-101: I am assuming this explains why these six glaciers are selected. It would be useful to state this when you talk about motivation for the study.

Paragraph starting with Line 105: This paragraph should go under Data section as it describes the data that will be used in the study.

Section 3, Line 125: Here would be good to summarize the steps of the analysis and refer to the flow chart figure 1.

Also, call this section Data and Methods, and then first describe the data (include the bits from the 'Study area') and then summarize the methods (Figure 1) and present then in more details the models.

Line 131: It seems that it would be more accurate to call this an empirical SEB approach as it does not really differ much from an enhanced degree-day modeling (key driver of melt is temperature with some calculated effect of insolation). A SEB model generally assesses (or uses as input) key contributors to melt energy, including net shortwave, net longwave radiation and turbulent heat fluxes. This is not what your SEB model does, and since it is dependent on calibration with observed mass balance it is indeed an empirical approach.

Line 140-145: Shouldn't it be more correct (and less wordy) to state here that the model is calibrated and run over the observational period available for each glacier separately?

Line 150-152: It is not clear here if these mass balance observations are from each of these six glaciers, or from glaciers in this region as a regional (subregional) assessment. Also, note that Huss and Hock, 2015 performed their calibration on a regional scale (matching each glacier's mass balance to be equal to the regional mass balance), which is probably not the case here, so you can't just refer for details to their paper. Please explain the key differences in the approach originally used in GloGEMflow and the one you use here.

Line 155-156: Effectively you have the same input to both the SEB and the degree day model, and considering that only temp is taken from GCM, both models (of melt) are responding to temperature changes only. Make sure to make this clear when you are introducing the models of mass balance: these are two empirical mass balance models, mainly relating melt to temperature. The range of 'complexity' level here is thus not really large.

Line 161: Please specify what variables are used for this bias corrections, what observed climate data (ERA5 or something else?), and what the overlapping time period is. Also, is the bias correction considered on monthly basis? The results of the bias correction are sensitive to the choice of time scale (monthly vs annual) as shown across multiple studies taking part in GlacierMIP (Marzeion et al., 2020).

Line 183-185: Is this calibration performed for each of the six glaciers separately? Considering that the results of this model for the six glaciers have been published, it would be good to state some key results here in terms of the model accuracy and uncertainty. This would be a better use of the space than talking about the model setup considering that the model has been run and results published in Van Tricht and Huybrechts, 2023)

Line 198: It would be useful to show how representative this representation of cross-section is to reality (considering that you have the GPR data for these six glaciers).

Section 3.3: What is the reference year the ice thickness data is assessed for, and how to you assure that this year the same for all the models?

Line 224-225: Before showing the results for the projections (also what is the initial year?), it would be useful to show the comparison of reconstructed mass balance with ERA5 for each glacier (for example from 1979 onwards). I assume there is some overlap between the ERA5 period and the calibration period, but regardless of this it would be useful to show these results.

Line 276: 'ice dynamics do not play a significant role in the future and...' : No, do not over-extrapolate the results. This suggest that the results between the two ice models are similar, and nothing more.

Line 284-289: 'The description of details on the model setup and calibration should be given in the Methods section, not in the results.

Line 298-301: Again, it would be useful to see the reconstructed glacier evolution over the ERA5 period. The difference between the models in this period will influence the differences in the projections.

Line 303-305: Make sure that in the Results section you only present the results w/o discussing them. There are many occasions in the results section where you go into discussion as well as speculation about the model dissimilarities and what drives them.

Table 2: It would be more interesting to show the year when glacier is projected to loose 50% of its current volume, 75% of current volume and 100% of its current volume.

Also, if you can present this in a figure rather than in a table it would be even better.

Line 316: It's not the model setup but the choice of model

Line 319: 'arguably one of the most important datasets when representing glaciers.' : Remove the sentence as it is speculative or back it up with references. Also, the motivation for this analysis should come much earlier (when the objectives are stated), not in the Results section.

Line 321: Is initial state represented for the year 2020? Not clear from the Methods section. Also, if 2020 is the initial year, what thickness data was used during the calibration period (presumably starting before 2020) of both the mass balance and ice flow models?

Figure 7: It would be interesting to see how the evolution of glacier area (rather than volume) looks like, considering that area initially (at 2000 or 2020) is more similar (ideally the same) among the models. The glacier area is also easier to measure than ice thickness so the RGI should provide you some good reference.

Line 407-408: 'uses the 20-year geodetic mass balance of Hugonnet et al. (2021) for calibration.' It is not clear is it only for these six glaciers or regionally. If only for these six glaciers, than it's not surprising that the results are similar for several reasons: a) the models are similar as they are both basically temperature-index models, b) the model calibration is similar as it is tuning the model parameters to match the observed mass balance (per glacier), c) the glaciological and geodetic mass balance should not be very dissimilar from each other over the overlapping periods -> something that you could (and probably should) even show. also Note that while you are calling the Huss and Hock (2015) model a regional mass balance model, it is essentially a local model too as it is applied locally to each glacier. to restate my comment from before: the original model was tuned to regional mass balance observations (so that each glacier in the region has the same mass balance as the regionally-averaged mass balance). You did not specify how the calibration was done here, but it the geodetic mass balance data you used is available for each of the six glaciers over the 20-yr period (as well as over the 5 and 10 yr periods).

Line 408: 'This accentuates the striking resemblance between the modelled volume evolutions.' : I disagree that that this is a surprising result considering the many similarities in the modeling approaches (see above).

Line 436-438: But these two mass balance forcings are essentially very similar. How novel is the finding that similar forcing will give similar projections in similarly calibrated empirical models?

Line 440: 'In contrast, local mass models such as the SEB model demand a greater amount of data.' : Please see my comments from before on this. The SEB model you use here can also be calibrated with geodetic mass balance data. In terms of input climate data it also uses only temp and precip as GloGEM model does. Effectively, you are stating here that as long as there are measurements of glacier mass balance (whether glaciological or geodetic) the empirical models of mass balance can be calibrated. This is not really an insight.

Line 443: Similarly to the mass balance model, the two ice flow models are rooted in the same physics. In fact, the flowline model is an improved version of the empirical approach used in Huss and Hock (2015) whose goal was to provide a good match with simulations from a 3-D ice flow model (see for example Huss, M., Juvet, G., Farinotti, D., and Bauder, A.: Future high-mountain hydrology: a new parameterization of glacier retreat, *Hydrol. Earth Syst. Sci.*, 2010). So effectively you are comparing an empirical model, originally developed to resemble a 3-D ice flow model simulations, with another 3-D ice flow model. How different these two models are really? Your results effectively show that they may be not different after all, but again we knew that already considering the history behind the models' development, which btw you did not elaborate on.

Line 448: 'we observe slightly larger differences...': This is expected as GloGEMflow is improved to better resemble the 3-D ice flow simulations than the dh-parameterization approach.

Line The conclusion is invalid as the analysis is not consistent: you used five GCMs while only two models of mass balance and two models of ice flow (which are arguably not that different either).

Line 456-457: The conclusion is invalid as the analysis is not consistent: you used five GCMs while only two models of mass balance and two models of ice flow (which are arguably not that different either).

Line 458-459: This comparison is invalid (see my comment from above) and also it is not clear what results are 'in line' with what. Your results are not in line with partitioning of uncertainties - and this is how the sentence reads.

Line 461-462: You show that substantially different initial ice volume (>50% difference) leads to substantially different volume projections. This can not be a key outcome as this is just, pardon me being blunt here, common sense. Also, the high sensitivity of projections to initial volume has been already shown in Huss et al (2014) as you point out.

Line 468: Seems to me that this may be the only 'new' result in the paper, but I don't know how much it differs from what already has been found in Farinotti et al 2019. After all, the consensus estimates were proposed on the basis of the model performance relative to the ice thickness measurements.

Line 480-481: This is not what you were testing here. You did not do any evaluation of model performance but the intercomparison of future projections.
